# Supplementary material for: Thiosemicarbazones Can Act Synergistically with Anthracyclines to Downregulate CHEK1 Expression and Induce DNA Damage in Cell Lines Derived from Pediatric Solid Tumors
Source: MDPI journal article supplement (doi:10.3390/ijms23158549), 2022-08-01
Supplement: s1 [file s1]

# SUPPLEMENTARY FIGURE S1

## Experiment 1:

Pgp

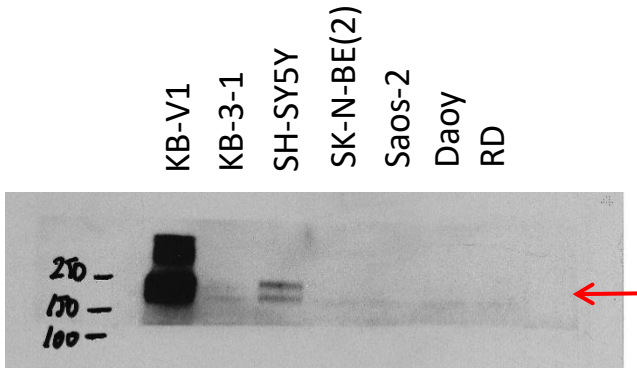

GAPDH

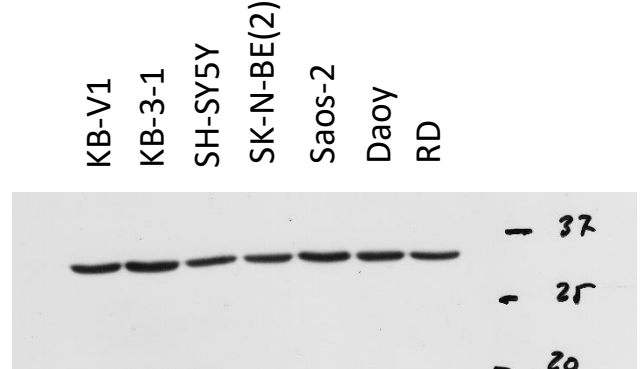

## Experiment 2:

Pgp

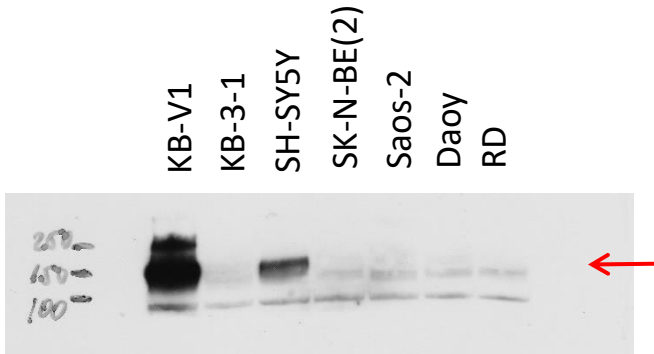

GAPDH

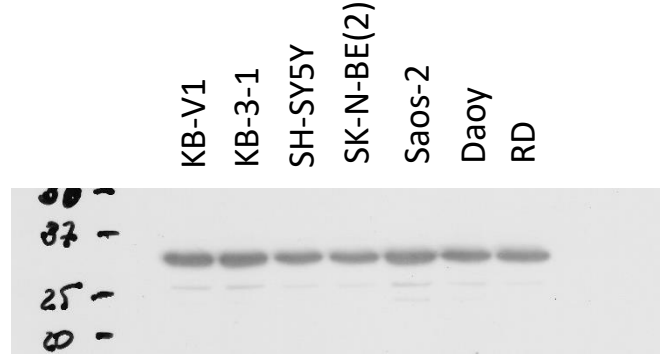

## Experiment 3:

Pgp

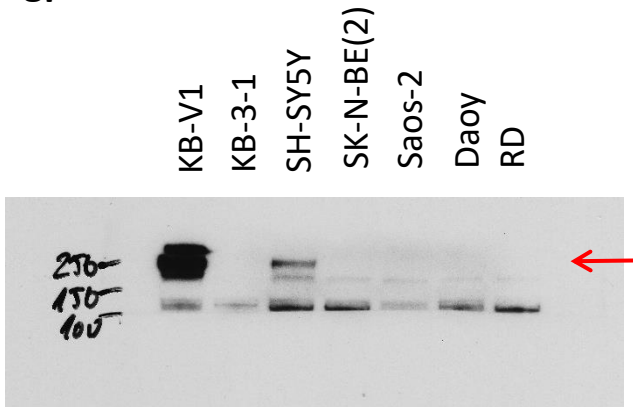

GAPDH

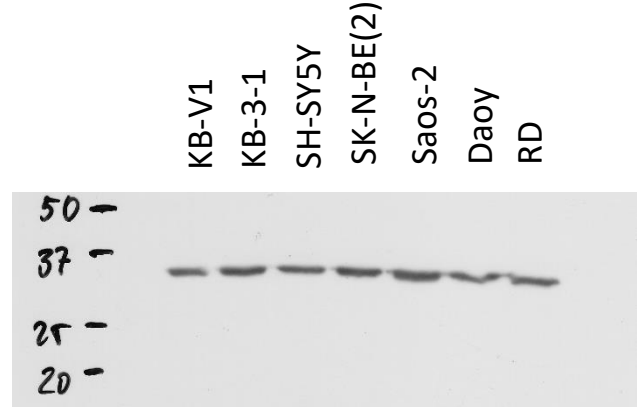

**Figure S1: Immunoblotting to determine endogenous Pgp levels in untreated cell lines.** GAPDH served as the loading control. The experiments were performed in biological triplicates.

## SUPPLEMENTARY FIGURE S2

### (A) KB-V1 cell line (positive control)

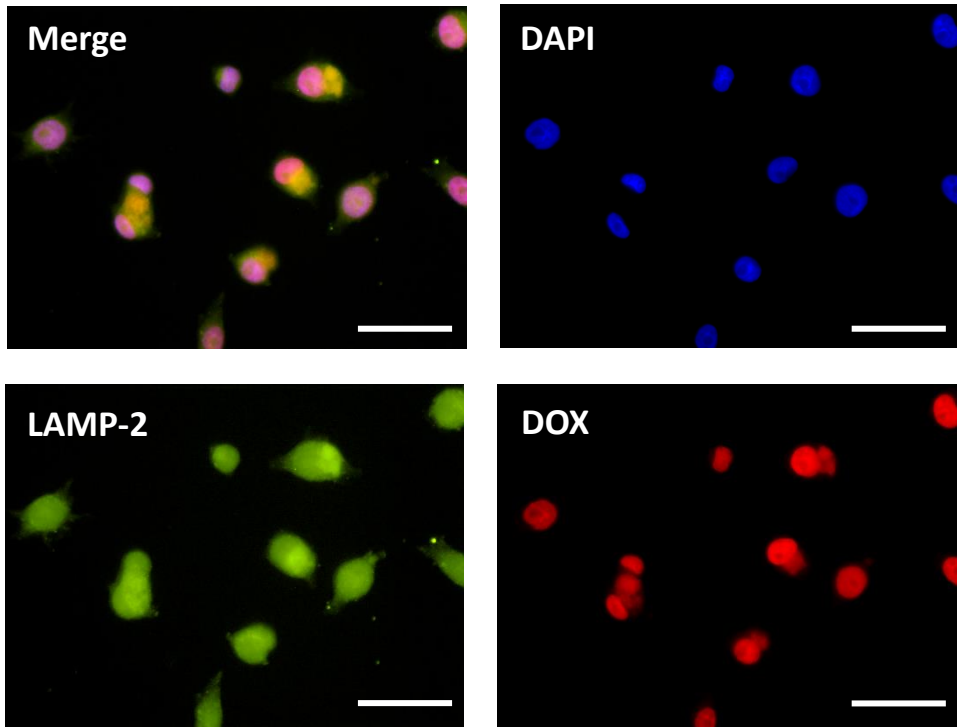

### (B) KB-3-1 cell line (negative control)

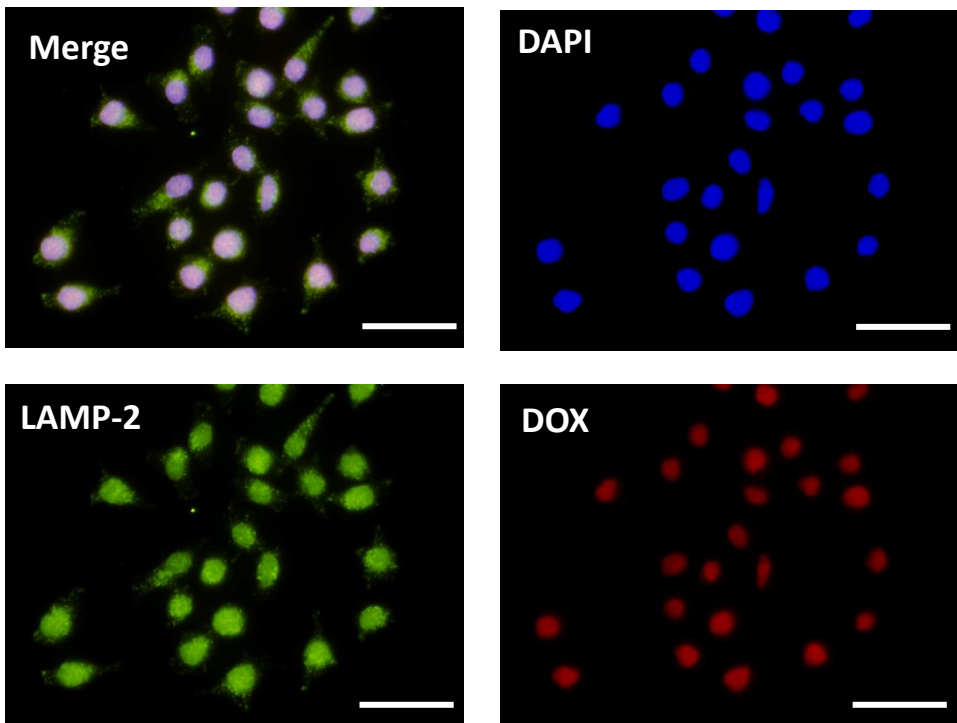

**Figure S2: Intracellular localization of doxorubicin.** The localization of doxorubicin (DOX) within the cells after 2 h of treatment with 10  $\mu$ M DOX (red) was observed using immunofluorescence microscopy. The target organelles, lysosomes and nuclei, were also stained. The lysosomes were visualized by indirect immunofluorescence using LAMP-2 primary antibody and Alexa 488-conjugated secondary antibody (green). The nuclei were labeled with DAPI (blue). **(A)** KB-V1 cell line served as a positive control for the lysosomal sequestration of DOX; **(B)** KB-3-1 cell line served as a negative control. Scale bars, 50  $\mu$ m.

## SUPPLEMENTARY FIGURE S2

### (C) SH-SY5Y cell line

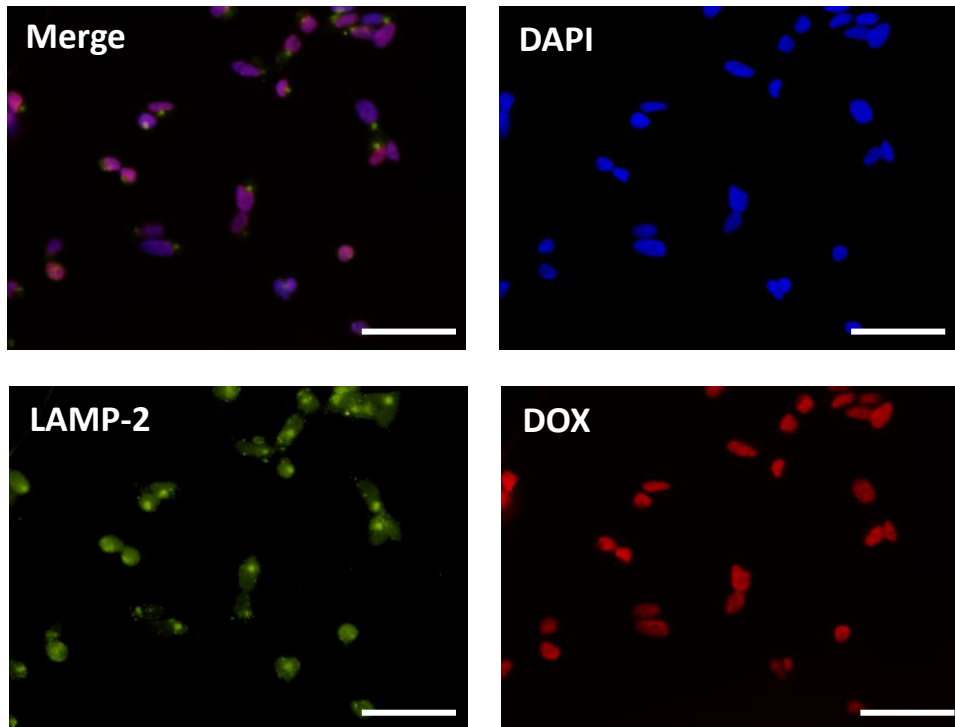

### (D) SK-N-BE(2) cell line

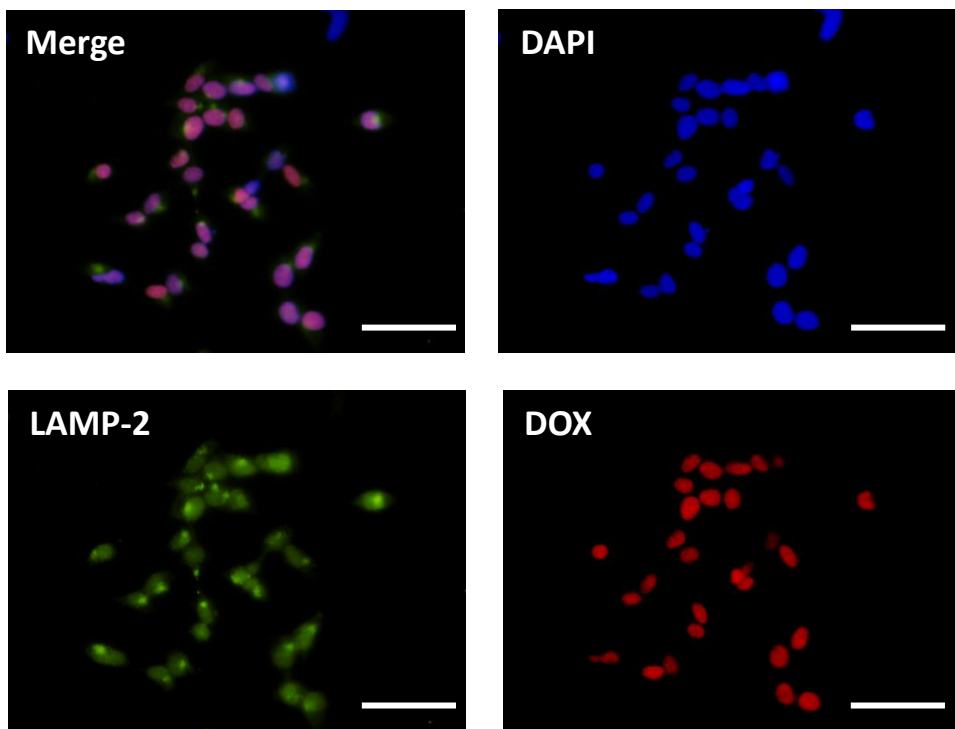

**Figure S2: Intracellular localization of doxorubicin.** The localization of doxorubicin (DOX) within the cells after 2 h of treatment with 10  $\mu$ M DOX (red) was observed using immunofluorescence microscopy. The target organelles, lysosomes and nuclei, were also stained. The lysosomes were visualized by indirect immunofluorescence using LAMP-2 primary antibody and Alexa 488-conjugated secondary antibody (green). The nuclei were labeled with DAPI (blue). Scale bars, 50  $\mu$ m.

## SUPPLEMENTARY FIGURE S2

### (E) Saos-2 cell line

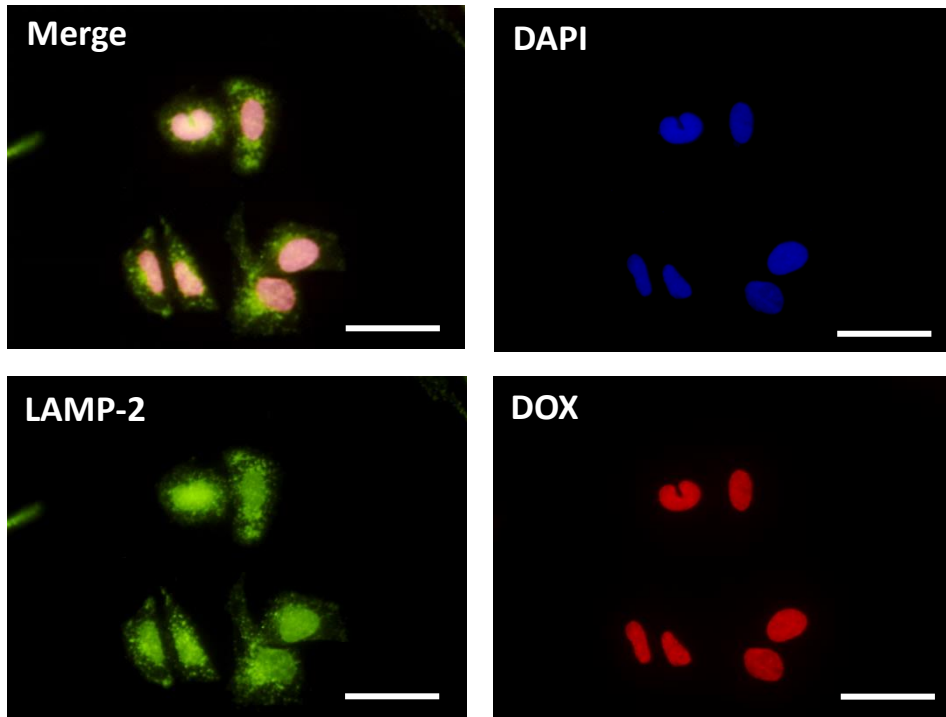

### (F) Daoy cell line

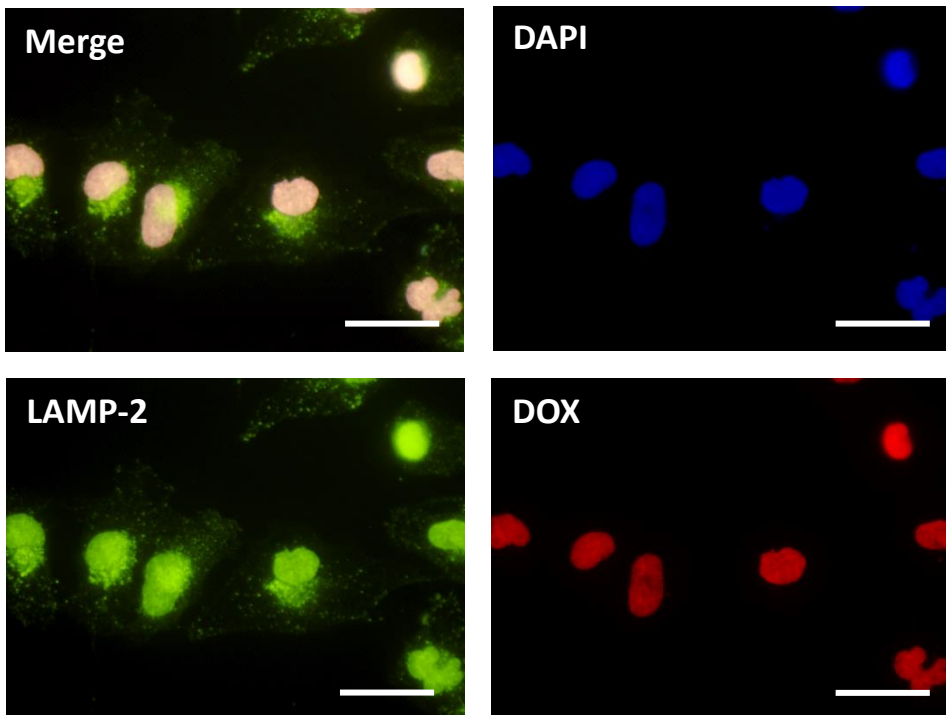

**Figure S2: Intracellular localization of doxorubicin.** The localization of doxorubicin (DOX) within the cells after 2 h of treatment with 10  $\mu$ M DOX (red) was observed using immunofluorescence microscopy. The target organelles, lysosomes and nuclei, were also stained. The lysosomes were visualized by indirect immunofluorescence using LAMP-2 primary antibody and Alexa 488-conjugated secondary antibody (green). The nuclei were labeled with DAPI (blue). Scale bars, 50  $\mu$ m.

## SUPPLEMENTARY FIGURE S2

### (G) RD cell line

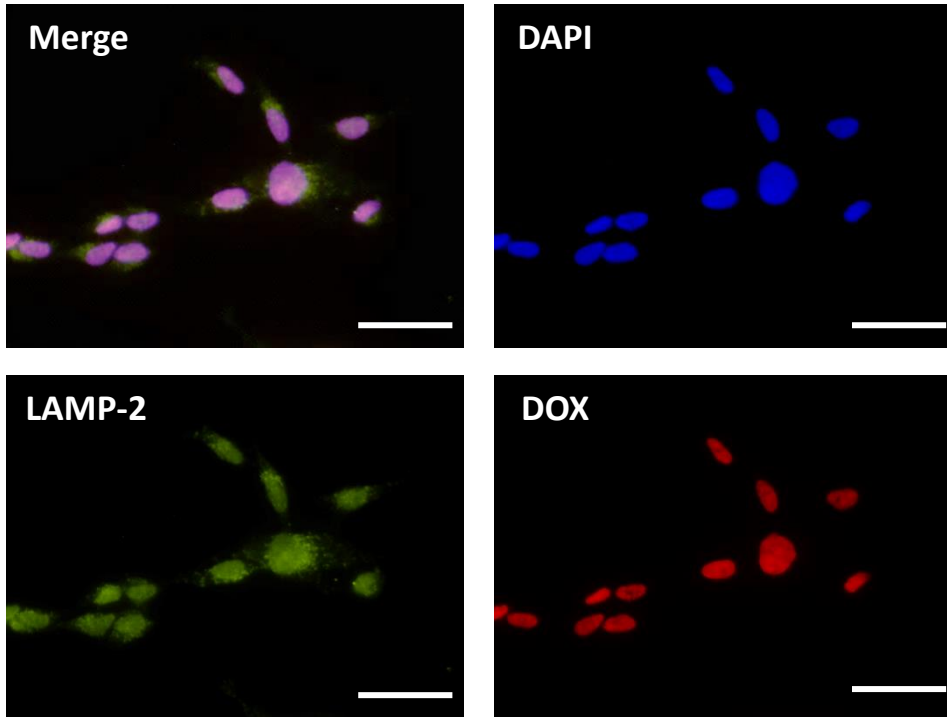

**Figure S2: Intracellular localization of doxorubicin.** The localization of doxorubicin (DOX) within the cells after 2 h of treatment with 10  $\mu$ M DOX (red) was observed using immunofluorescence microscopy. The target organelles, lysosomes and nuclei, were also stained. The lysosomes were visualized by indirect immunofluorescence using LAMP-2 primary antibody and Alexa 488-conjugated secondary antibody (green). The nuclei were labeled with DAPI (blue). Scale bars, 50  $\mu$ m.

# SUPPLEMENTARY FIGURE S3

## (A) SH-SY5Y cell line

### Experiment 1

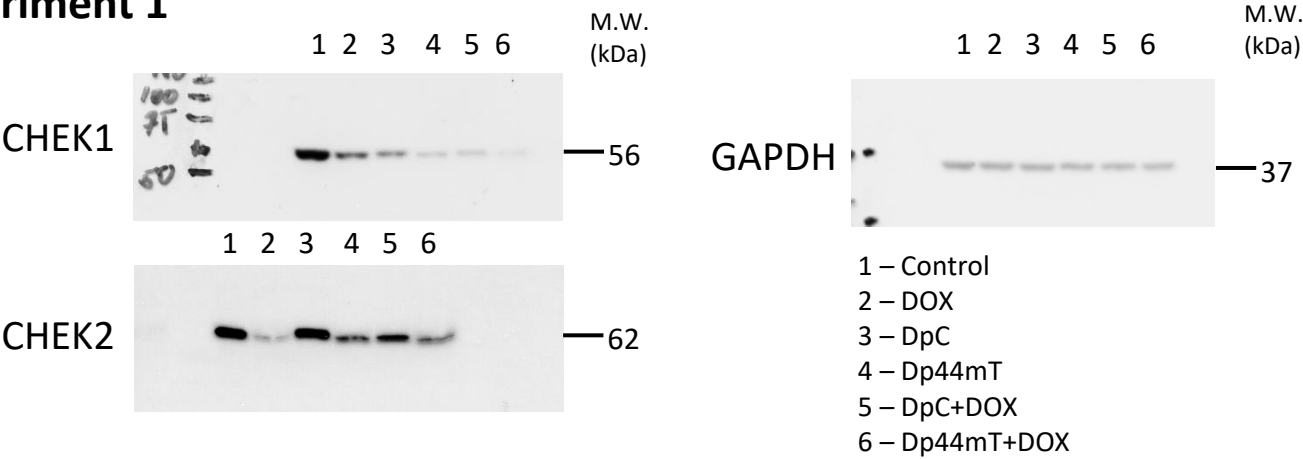

### Experiment 2

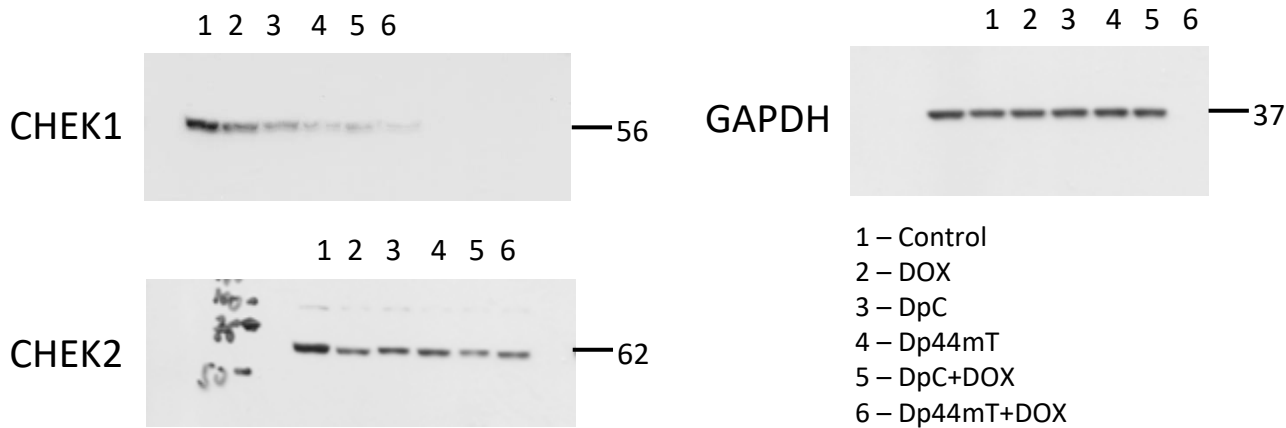

### Experiment 3

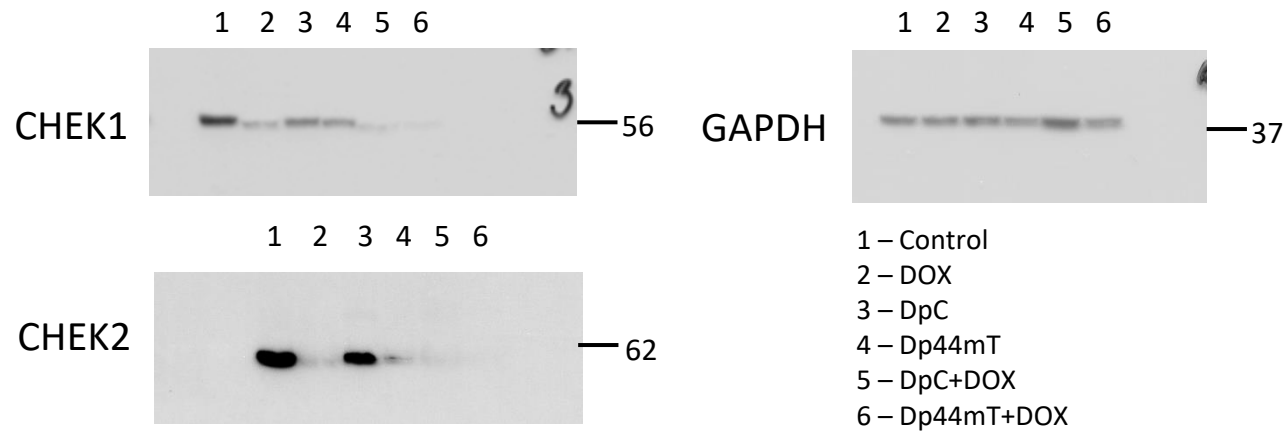

**Figure S3: Immunoblotting to determine CHEK1 and CHEK2 levels in cell lines after the experimental treatment.** CHEK1 and CHEK2 levels were examined after 3 days of incubation with IC<sub>50</sub> doses of DOX, DpC, Dp44mT or their combinations. GAPDH served as the loading control. The experiments were performed in biological triplicates.

# SUPPLEMENTARY FIGURE S3

## (B) SK-N-BE(2) cell line

### Experiment 1

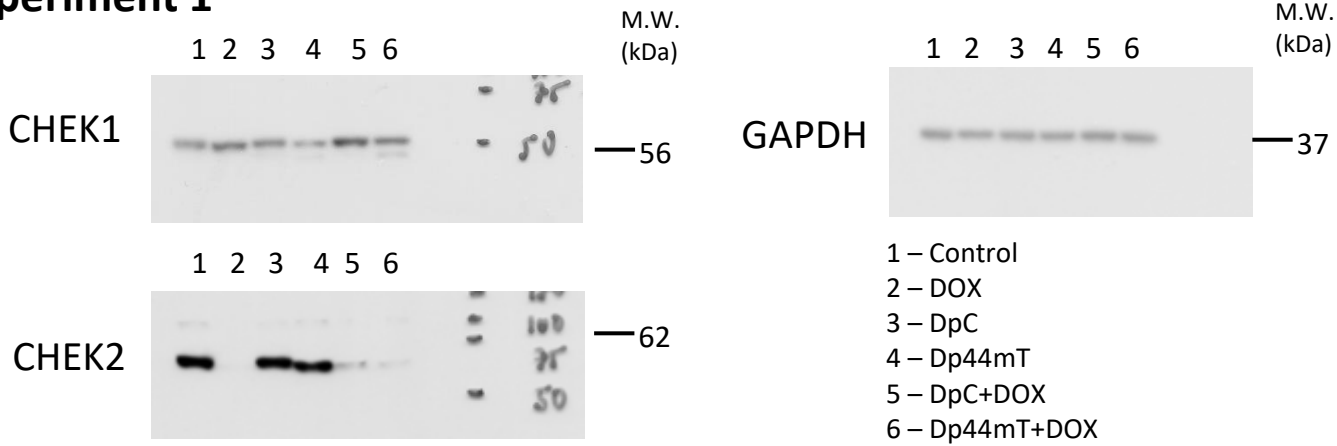

### Experiment 2

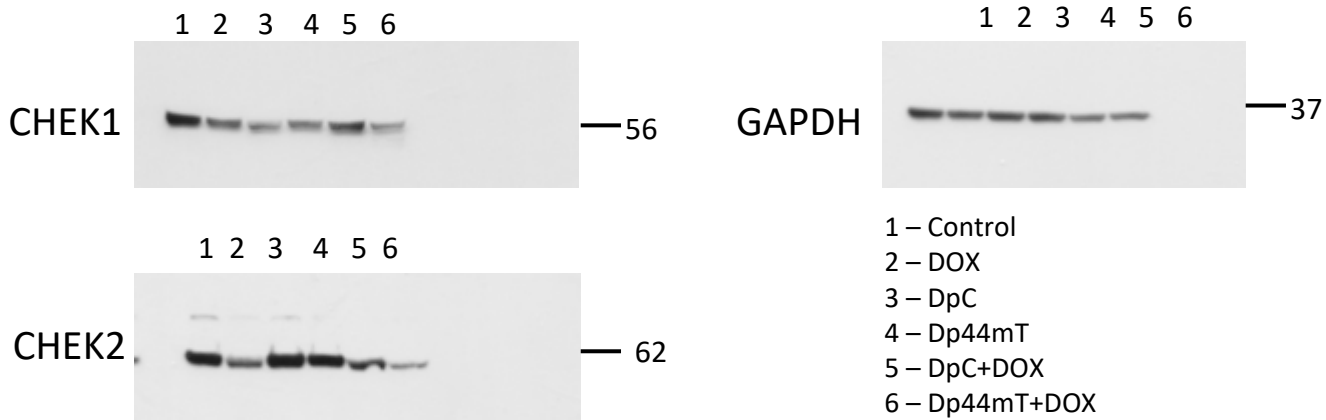

### Experiment 3

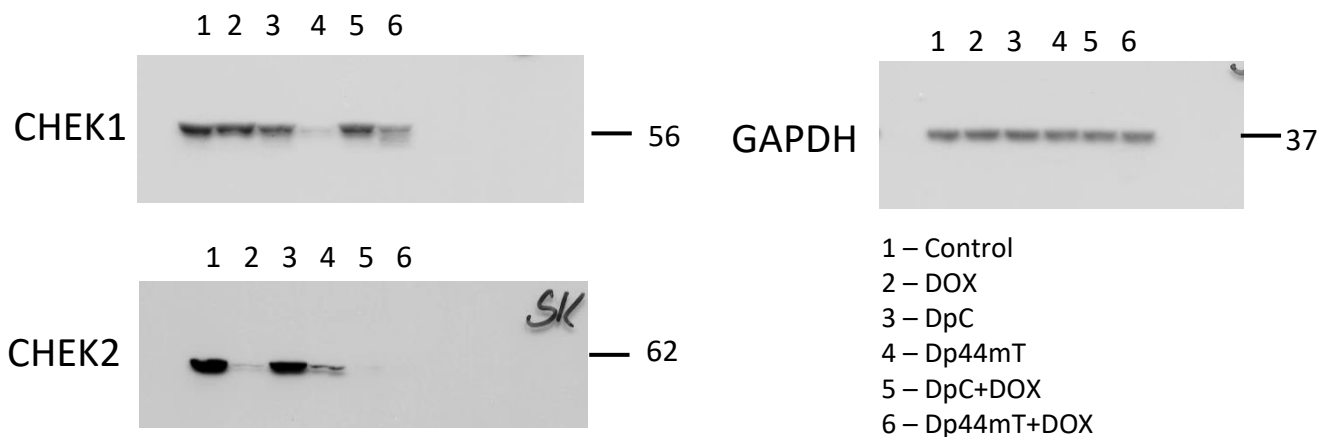

**Figure S3: Immunoblotting to determine CHEK1 and CHEK2 levels in cell lines after the experimental treatment.** CHEK1 and CHEK2 levels were examined after 3 days of incubation with IC<sub>50</sub> doses of DOX, DpC, Dp44mT or their combinations. GAPDH served as the loading control. The experiments were performed in biological triplicates.

# SUPPLEMENTARY FIGURE S3

## (C) Saos-2 cell line

### Experiment 1

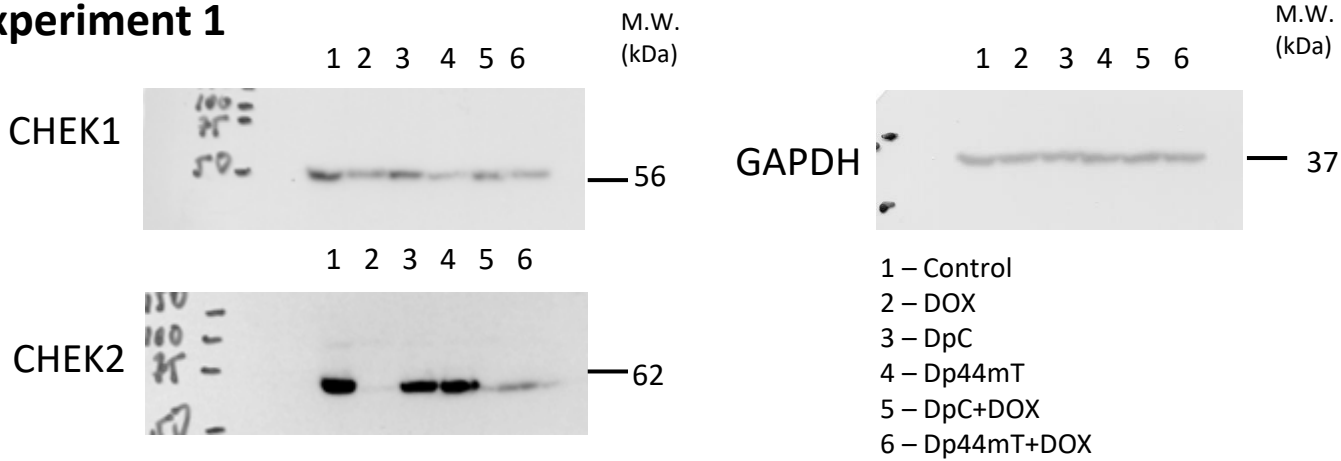

### Experiment 2

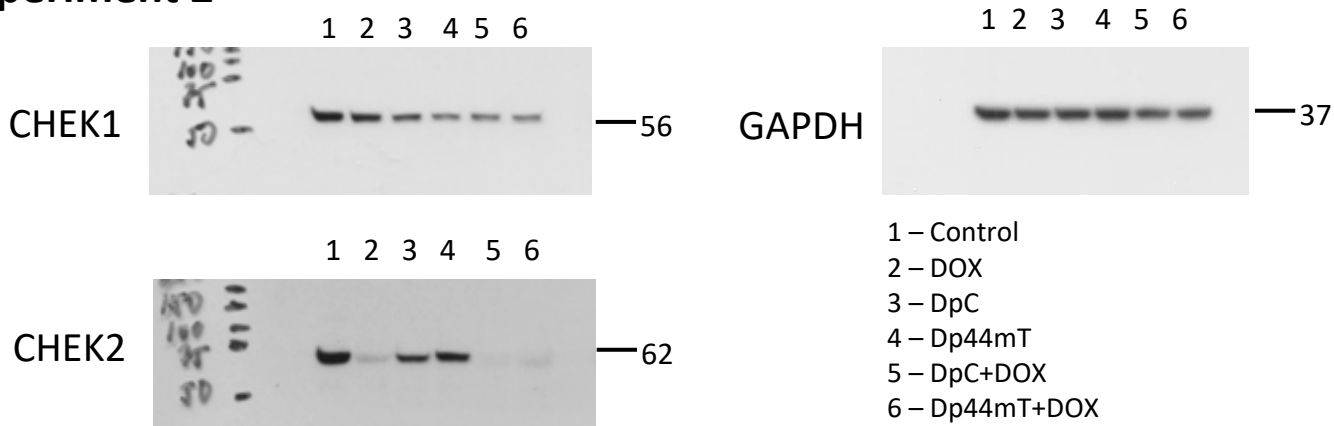

### Experiment 3

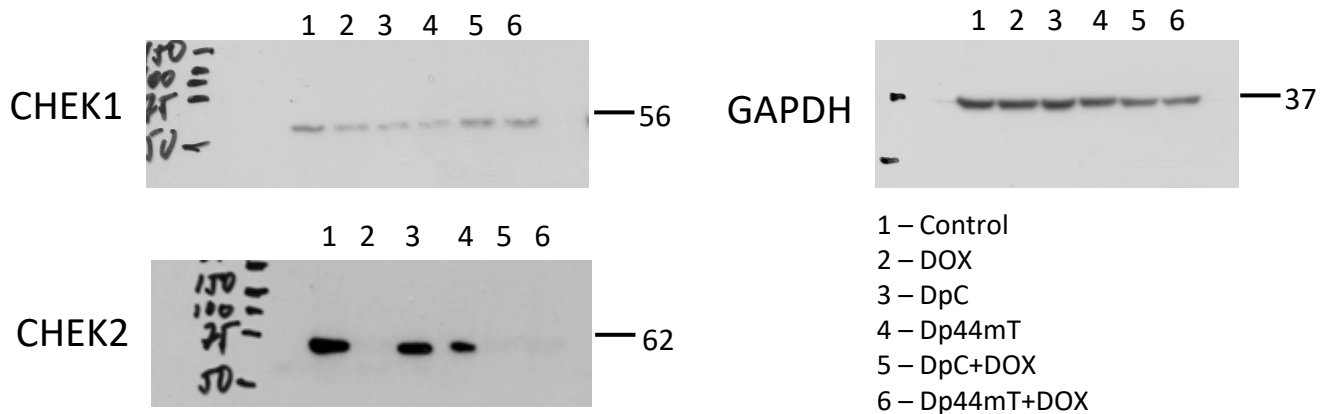

**Figure S3: Immunoblotting to determine CHEK1 and CHEK2 levels in cell lines after the experimental treatment.** CHEK1 and CHEK2 levels were examined after 3 days of incubation with  $IC_{50}$  doses of DOX, DpC, Dp44mT or their combinations. GAPDH served as the loading control. The experiments were performed in biological triplicates.



# SUPPLEMENTARY FIGURE S3

## (D) Daoy cell line

### Experiment 1

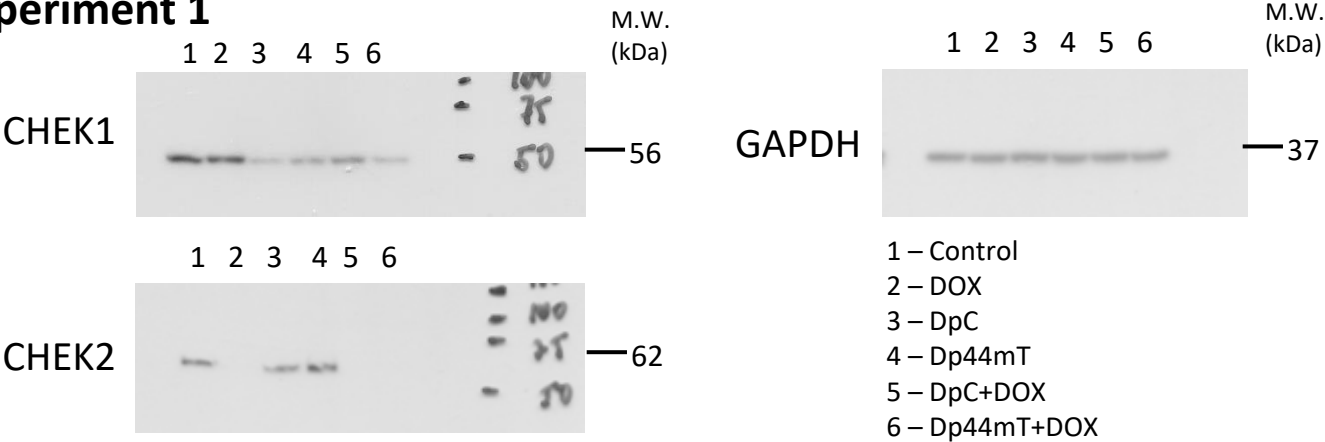

### Experiment 2

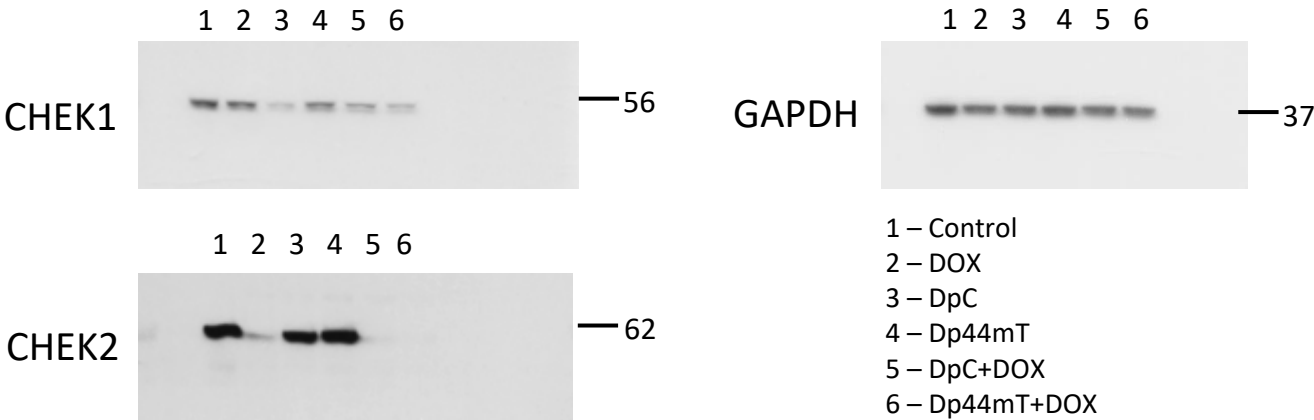

### Experiment 3

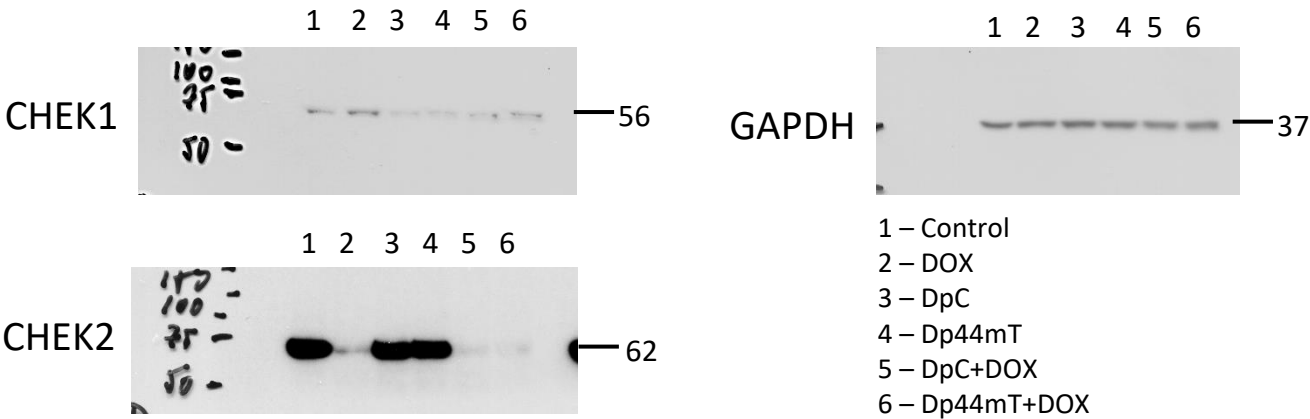

**Figure S3: Immunoblotting to determine CHEK1 and CHEK2 levels in cell lines after the experimental treatment.** CHEK1 and CHEK2 levels were examined after 3 days of incubation with IC<sub>50</sub> doses of DOX, DpC, Dp44mT or their combinations. GAPDH served as the loading control. The experiments were performed in biological triplicates.

# SUPPLEMENTARY FIGURE S3

## (E) RD cell line

### Experiment 1

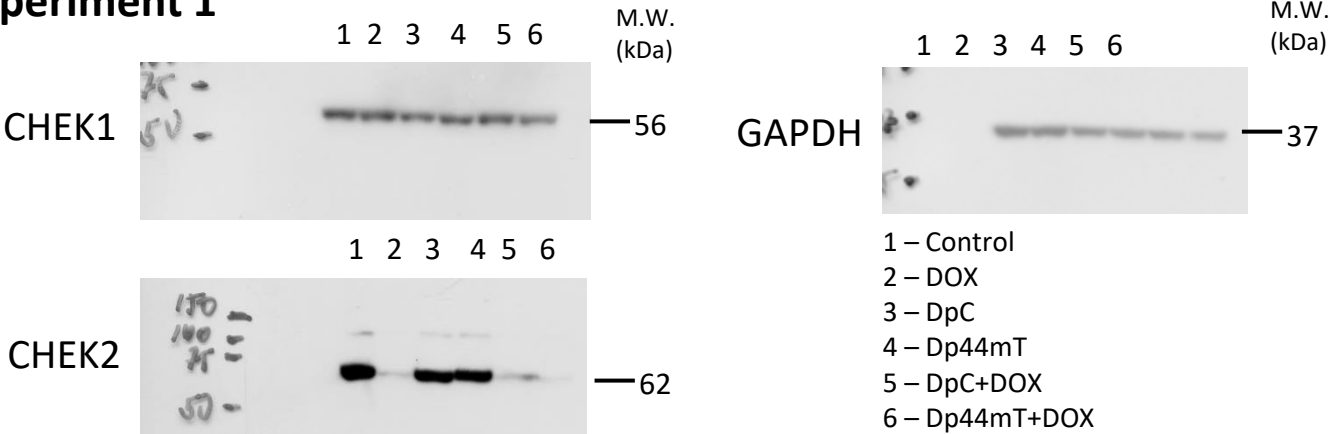

### Experiment 2

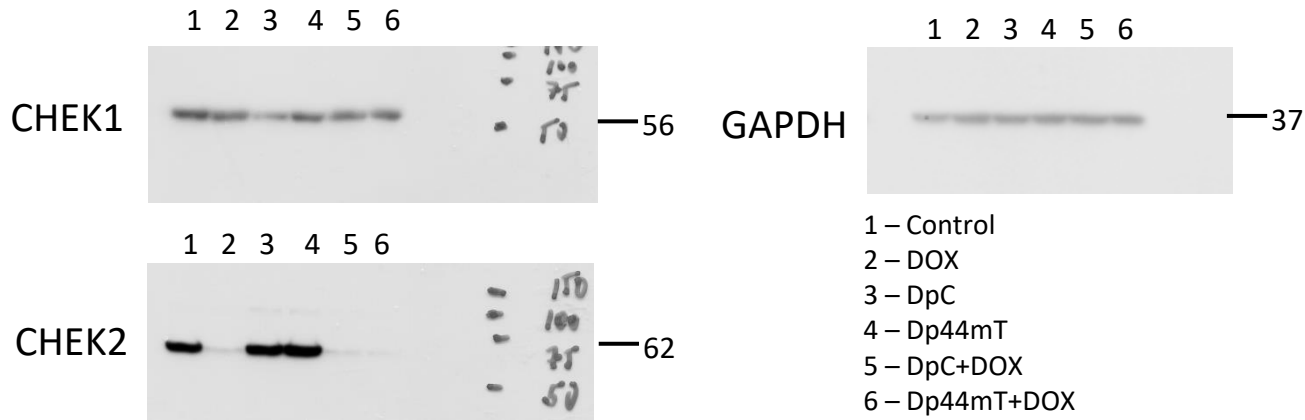

### Experiment 3

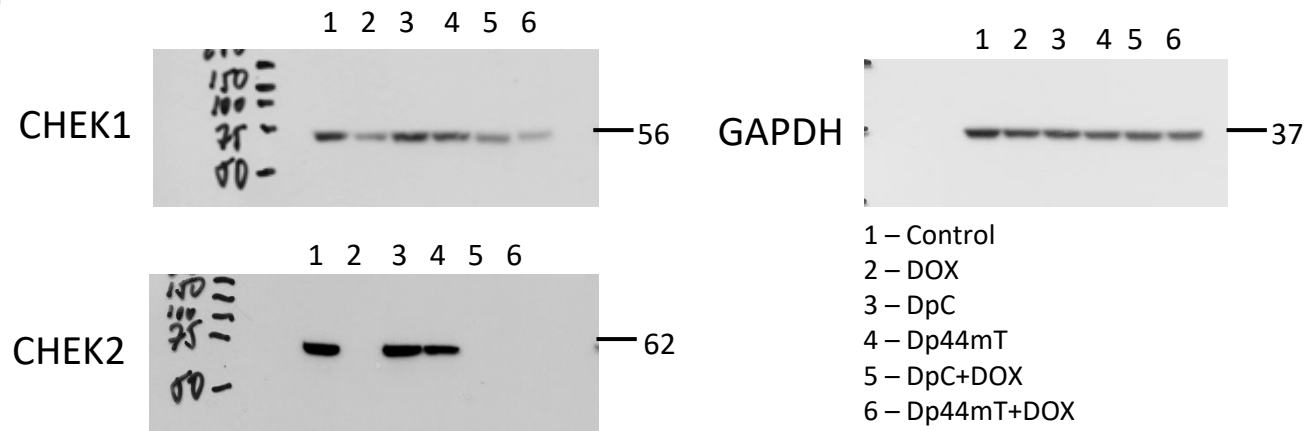

**Figure S3: Immunoblotting to determine CHEK1 and CHEK2 levels in cell lines after the experimental treatment.** CHEK1 and CHEK2 levels were examined after 3 days of incubation with IC<sub>50</sub> doses of DOX, DpC, Dp44mT or their combinations. GAPDH served as the loading control. The experiments were performed in biological triplicates.

## SUPPLEMENTARY FIGURE S4

### (A) SH-SY5Y cell line

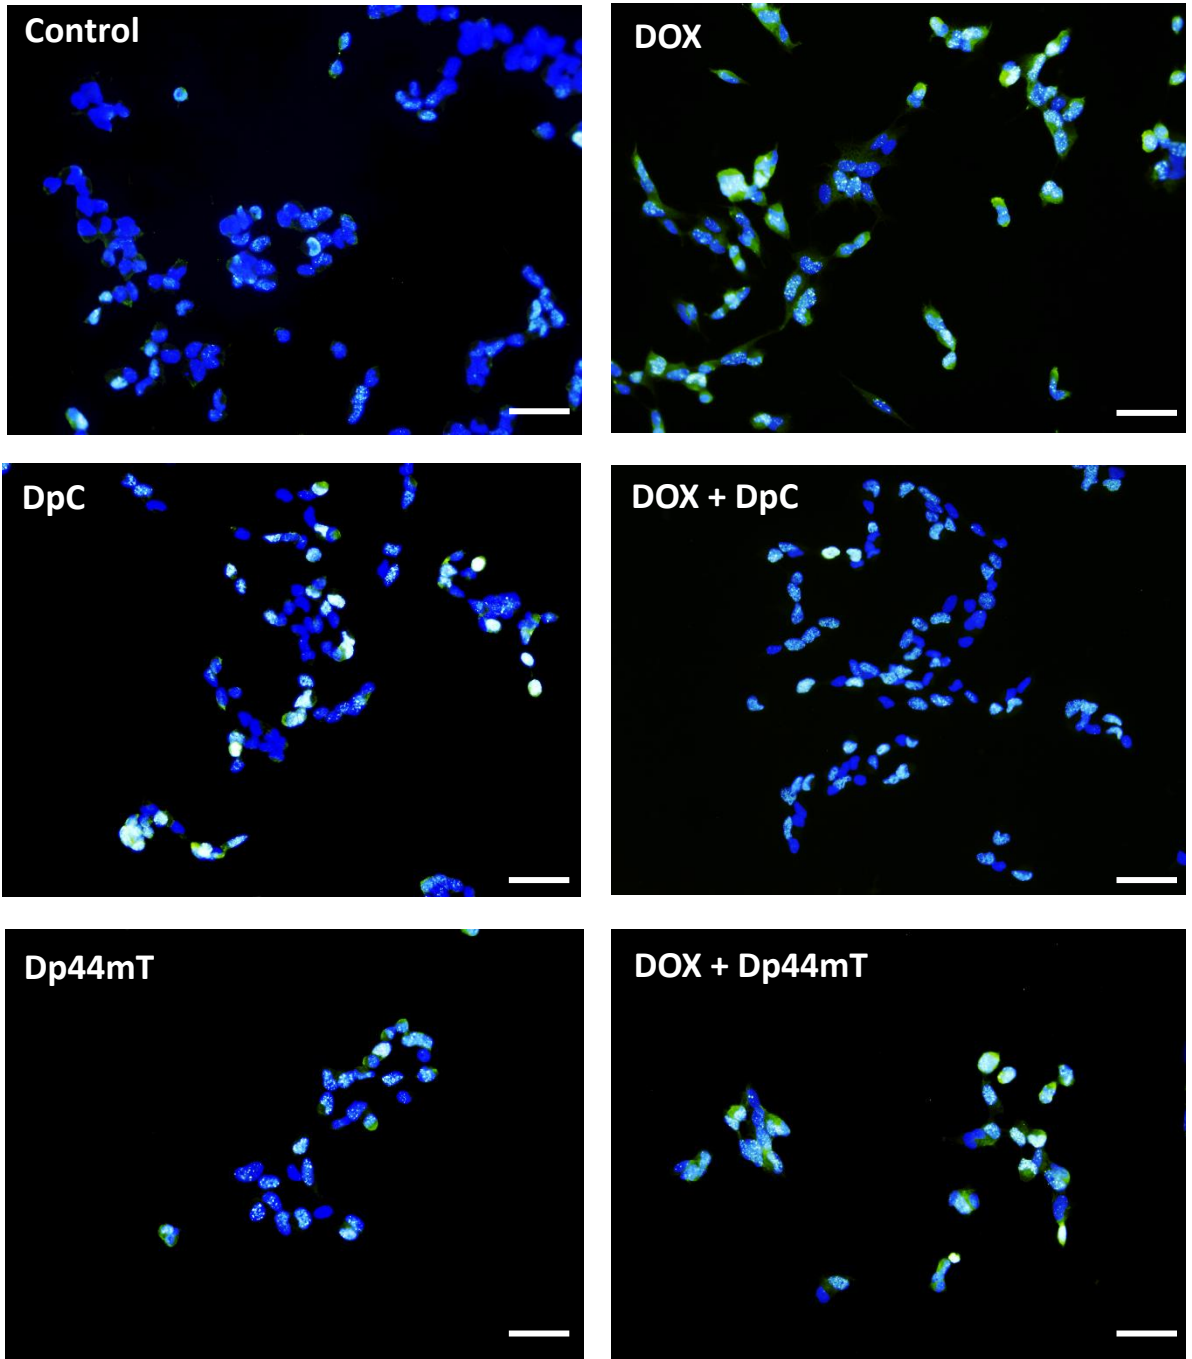

**Figure S4: Detection of phosphorylated  $\gamma$ -H2AX as double-strand break marker in cell lines after the experimental treatment.** Immunofluorescence was performed after 48 h treatment with  $IC_{50}$  doses of DpC, Dp44mT, DOX or their combinations. Phosphorylated  $\gamma$ -H2AX was visualized using the  $\gamma$ -H2AX primary antibody and Alexa 488-conjugated secondary antibody (green). The nuclei were labeled by DAPI (blue). Scale bars, 50  $\mu$ m.

## SUPPLEMENTARY FIGURE S4

### (B) SK-N-BE(2) cell line

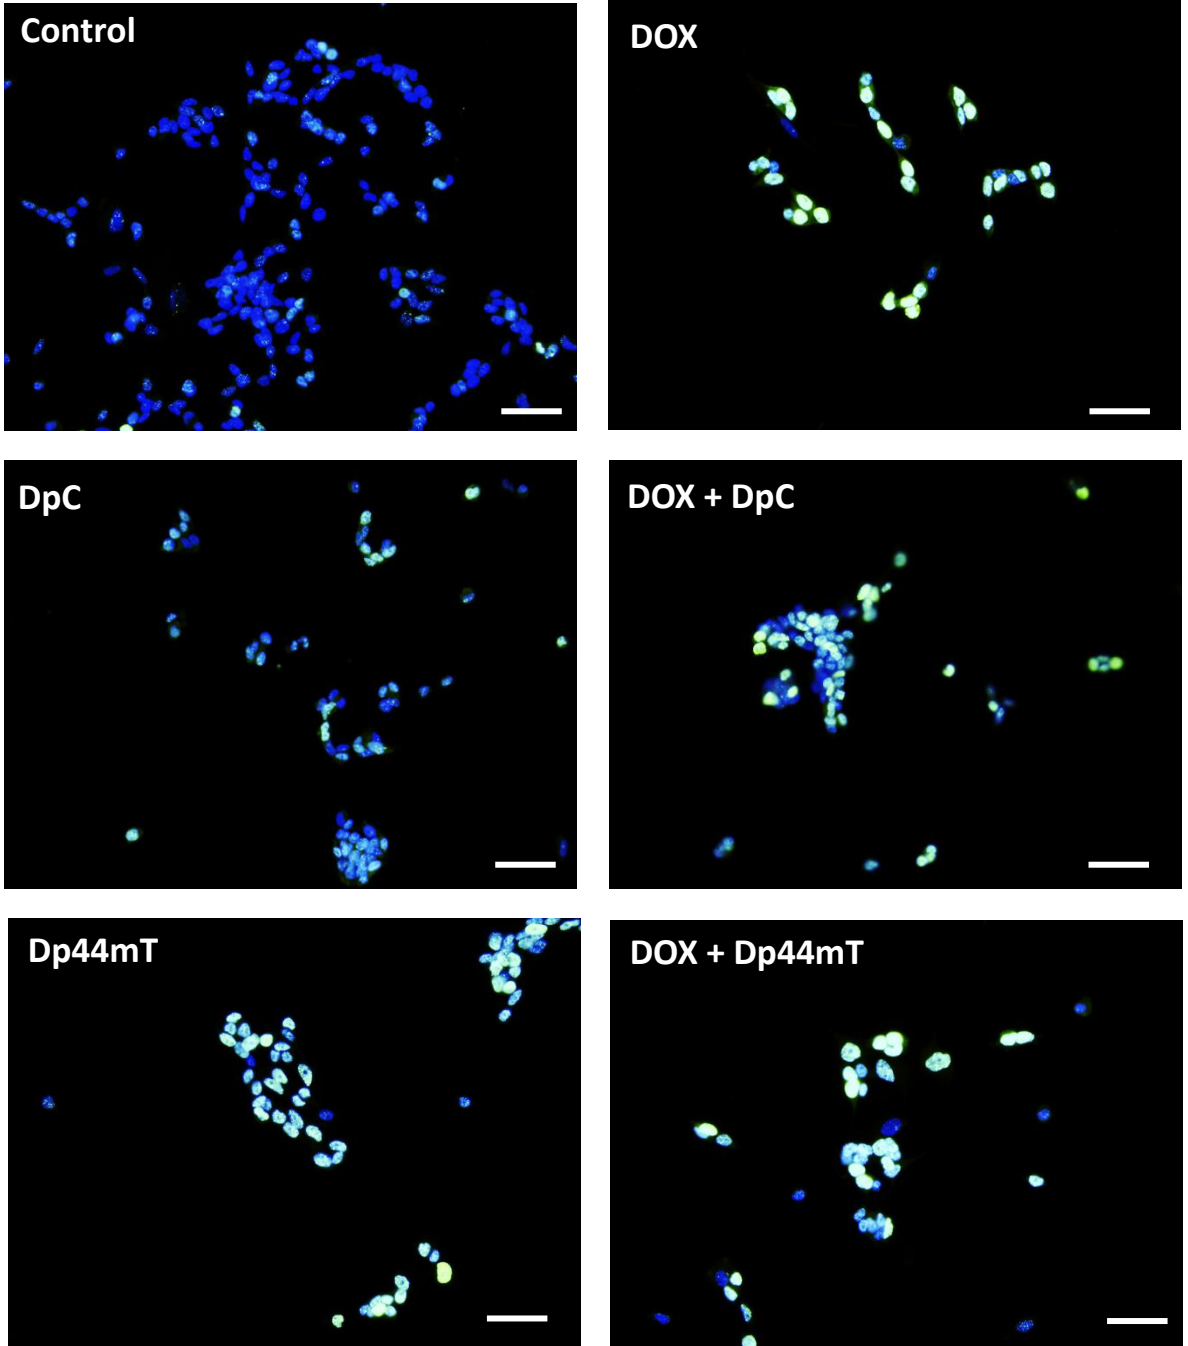

**Figure S4: Detection of phosphorylated  $\gamma$ -H2AX as double-strand break marker in cell lines after the experimental treatment.** Immunofluorescence was performed after 48 h treatment with  $IC_{50}$  doses of DpC, Dp44mT, DOX or their combinations. Phosphorylated  $\gamma$ -H2AX was visualized using the  $\gamma$ -H2AX primary antibody and Alexa 488-conjugated secondary antibody (green). The nuclei were labeled by DAPI (blue). Scale bars, 50  $\mu$ m.

## SUPPLEMENTARY FIGURE S4

### (C) Saos-2 cell line

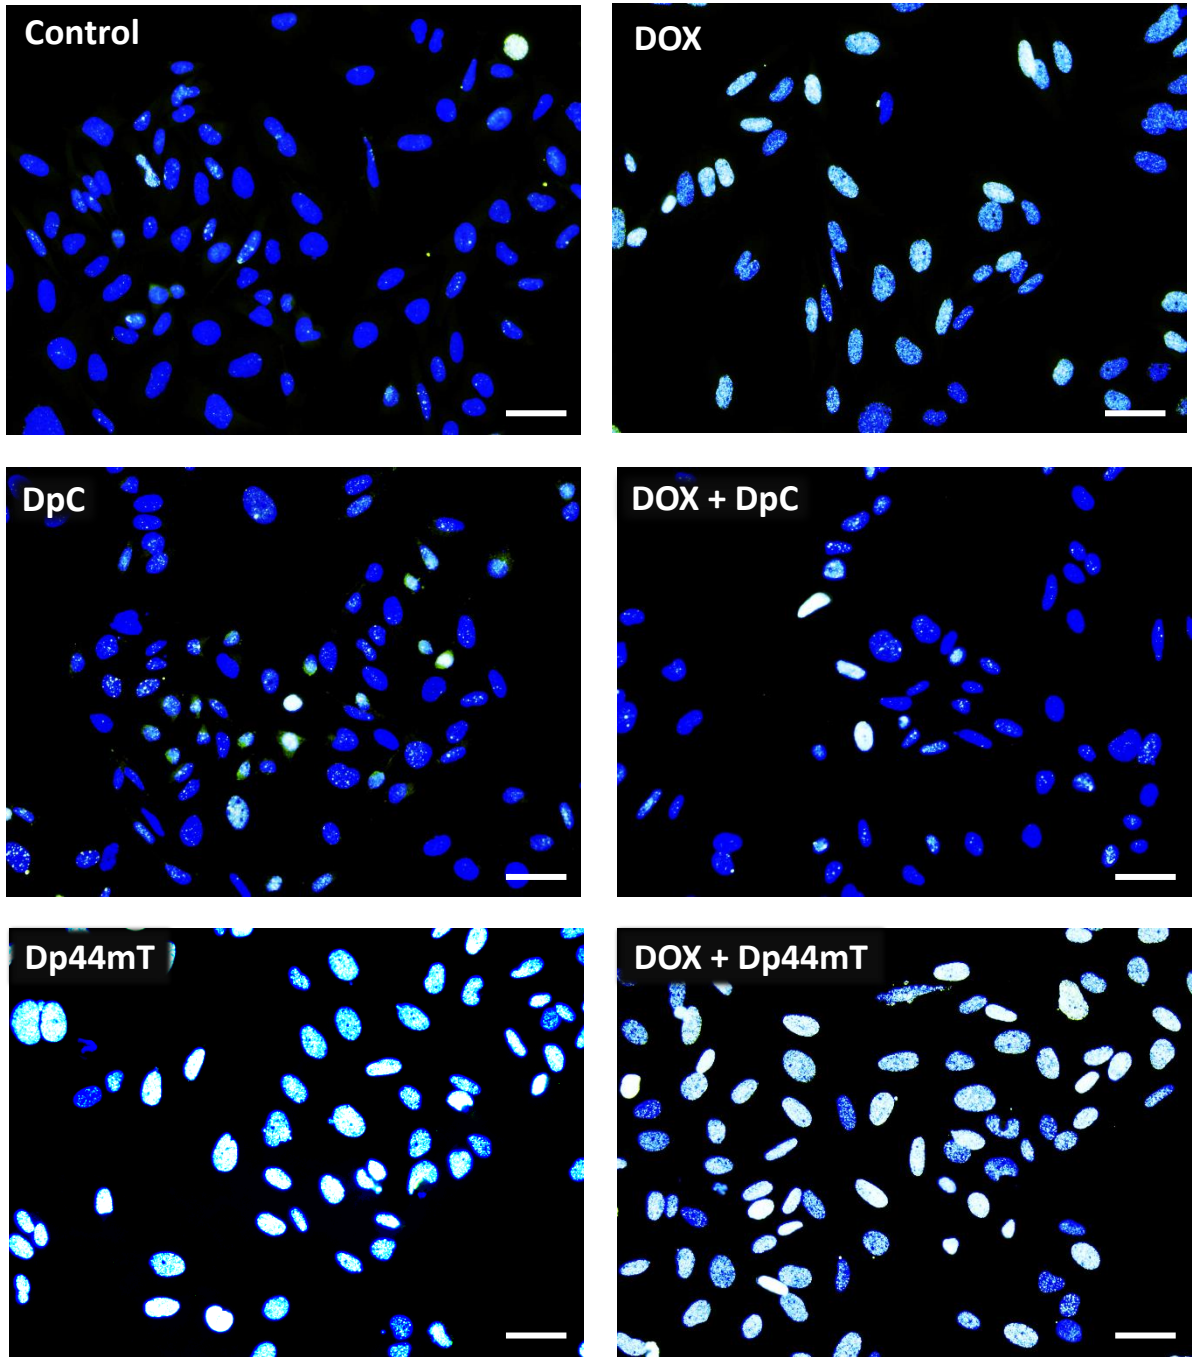

**Figure S4: Detection of phosphorylated  $\gamma$ -H2AX as double-strand break marker in cell lines after the experimental treatment.** Immunofluorescence was performed after 48 h treatment with  $IC_{50}$  doses of DpC, Dp44mT, DOX or their combinations. Phosphorylated  $\gamma$ -H2AX was visualized using the  $\gamma$ -H2AX primary antibody and Alexa 488-conjugated secondary antibody (green). The nuclei were labeled by DAPI (blue). Scale bars, 50  $\mu$ m.

## SUPPLEMENTARY FIGURE S4

### (D) Daoy cell line

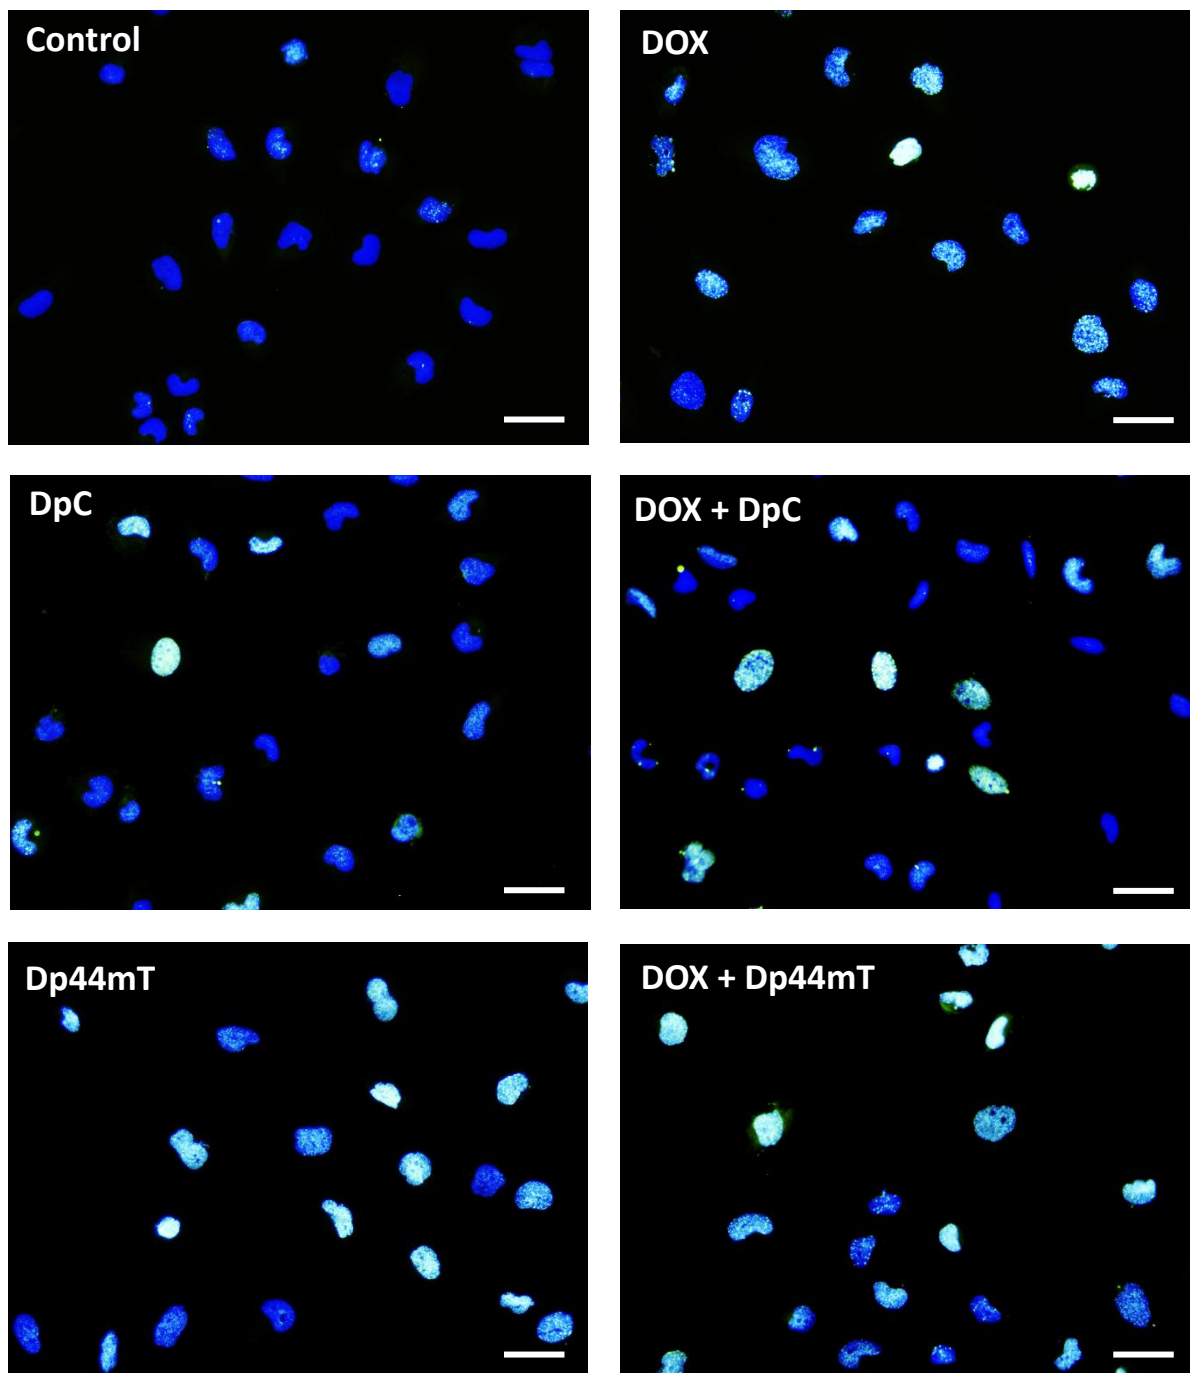

**Figure S4: Detection of phosphorylated  $\gamma$ -H2AX as double-strand break marker in cell lines after the experimental treatment.** Immunofluorescence was performed after 48 h treatment with  $IC_{50}$  doses of DpC, Dp44mT, DOX or their combinations. Phosphorylated  $\gamma$ -H2AX was visualized using the  $\gamma$ -H2AX primary antibody and Alexa 488-conjugated secondary antibody (green). The nuclei were labeled by DAPI (blue). Scale bars, 50  $\mu$ m.

## SUPPLEMENTARY FIGURE S4

### (E) RD cell line

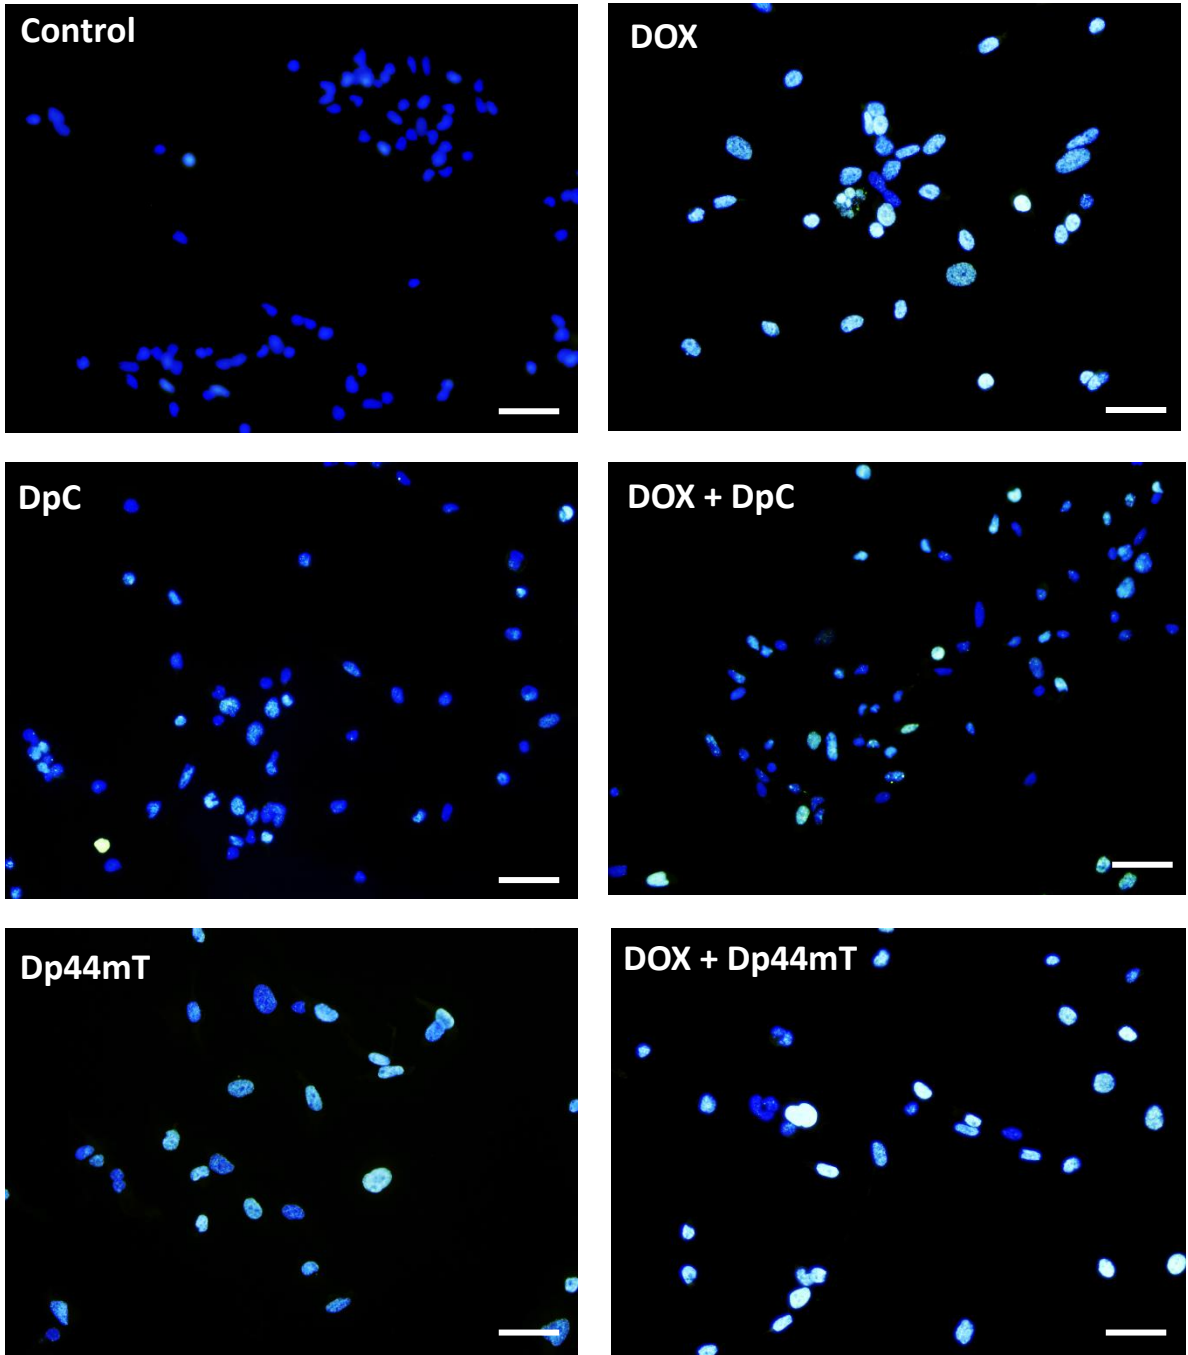

**Figure S4: Detection of phosphorylated  $\gamma$ -H2AX as double-strand break marker in cell lines after the experimental treatment.** Immunofluorescence was performed after 48 h treatment with  $IC_{50}$  doses of DpC, Dp44mT, DOX or their combinations. Phosphorylated  $\gamma$ -H2AX was visualized using the  $\gamma$ -H2AX primary antibody and Alexa 488-conjugated secondary antibody (green). The nuclei were labeled by DAPI (blue). Scale bars, 50  $\mu$ m.

# SUPPLEMENTARY TABLE S1

|            |                                | Control<br>[mean ± sd] | DOX<br>[mean ± sd] | DAU<br>[mean ± sd] | MIT<br>[mean ± sd] |
|------------|--------------------------------|------------------------|--------------------|--------------------|--------------------|
| SH-SY5Y    | sub G <sub>1</sub>             | 3.2 ± 1.6              | 19.5 ± 3.4         | 32.6 ± 4.4         | 29.2 ± 7.3         |
|            | G <sub>0</sub> /G <sub>1</sub> | 59.9 ± 6.0             | 42.7 ± 9.4         | 36.3 ± 9.7         | 41.9 ± 7.3         |
|            | S                              | 11.0 ± 4.8             | 11.6 ± 3.1         | 12.3 ± 0.8         | 12.6 ± 2.4         |
|            | G <sub>2</sub> /M              | 25.9 ± 4.9             | 26.1 ± 8.2         | 18.8 ± 5.5         | 16.3 ± 1.1         |
| SK-N-BE(2) | sub G <sub>1</sub>             | 2.7 ± 1.4              | 7.7 ± 2.4          | 13.6 ± 5.2         | 15.3 ± 0.9         |
|            | G <sub>0</sub> /G <sub>1</sub> | 54.7 ± 0.5             | 13.7 ± 2.0         | 15.8 ± 1.8         | 24.3 ± 6.1         |
|            | S                              | 13.8 ± 0.7             | 23.0 ± 13.2        | 19.4 ± 4.2         | 20.4 ± 1.6         |
|            | G <sub>2</sub> /M              | 28.8 ± 1.0             | 55.6 ± 14.2        | 51.1 ± 3.2         | 40.1 ± 7.3         |
| Saos-2     | sub G <sub>1</sub>             | 1.7 ± 0.7              | 18.7 ± 12.1        | 42.7 ± 3.1         | 23.1 ± 5.4         |
|            | G <sub>0</sub> /G <sub>1</sub> | 61.4 ± 2.7             | 16.5 ± 12.7        | 7.7 ± 0.3          | 9.3 ± 2.4          |
|            | S                              | 14.0 ± 2.1             | 11.3 ± 1.5         | 10.7 ± 2.1         | 10.6 ± 1.0         |
|            | G <sub>2</sub> /M              | 22.9 ± 1.0             | 53.5 ± 12.6        | 38.8 ± 3.3         | 57.0 ± 5.1         |
| Daoy       | sub G <sub>1</sub>             | 1.6 ± 0.5              | 25.5 ± 4.4         | 26.1 ± 7.3         | 26.0 ± 4.3         |
|            | G <sub>0</sub> /G <sub>1</sub> | 63.7 ± 2.2             | 14.7 ± 4.6         | 12.3 ± 3.3         | 16.0 ± 2.5         |
|            | S                              | 16.2 ± 2.4             | 13.6 ± 0.6         | 18.0 ± 2.5         | 13.3 ± 1.9         |
|            | G <sub>2</sub> /M              | 18.5 ± 1.0             | 46.2 ± 8.4         | 43.6 ± 10.5        | 44.7 ± 2.3         |
| RD         | sub G <sub>1</sub>             | 1.3 ± 0.1              | 13.4 ± 6.4         | 25.4 ± 15.7        | 18.7 ± 13.1        |
|            | G <sub>0</sub> /G <sub>1</sub> | 55.5 ± 4.9             | 20.7 ± 17.5        | 23.7 ± 5.3         | 23.1 ± 3.6         |
|            | S                              | 12.0 ± 2.8             | 11.6 ± 5.6         | 11.2 ± 2.2         | 11.0 ± 2.4         |
|            | G <sub>2</sub> /M              | 31.2 ± 2.5             | 54.4 ± 25.4        | 39.7 ± 21.6        | 47.2 ± 18.9        |

**Table S1: Cell cycle analysis in cell lines after the treatment with IC<sub>50</sub> doses of anthracyclines.** DNA content was measured after propidium iodide staining with subsequent flow cytometry detection. The changes in the cell cycle were obtained after 72 h of treatment with IC<sub>50</sub> doses of doxorubicin (DOX), daunorubicin (DAU) or mitoxantrone (MIT). The table provides values representing mean ± sd (%) for each cell proportion in the cell cycle phases (sub G<sub>1</sub>, G<sub>0</sub>/G<sub>1</sub>, S and G<sub>2</sub>/M). All experiments were performed in biological triplicates.
